# Supplementary material for: Efficient Generation of Germ Line Transmitting Chimeras from C57BL/6N ES Cells by Aggregation with Outbred Host Embryos
Source: PubMed Central journal article supplement (PMC2889837; doi:10.1371/journal.pone.0011260), 2010-06-22
Supplement: pone.0011260.s001.pdf [file pone.0011260.s001.pdf]

**Table S1. Number, chimerism and GLT data for mice derived from targeted C57BL/6NTac-C2 clones cultured in either RESGRO™, VGB6, or KOSR immediately before aggregation.**

| Construct | Gene Name | Clone ID | Media  | Total # aggregates transferred | Development |       |          |        |        | Weaned |      |   | Males' ES coat colour contribution |      |        |        | Fertility |      |       |      |
|-----------|-----------|----------|--------|--------------------------------|-------------|-------|----------|--------|--------|--------|------|---|------------------------------------|------|--------|--------|-----------|------|-------|------|
|           |           |          |        |                                | Born        |       | Chimeras |        |        | M      |      | F | %chim >50%                         | 100% | 99-75% | 74-50% | <50%      | # BP | # GLT | %    |
|           |           |          |        |                                | #           | %     | #        | %born  | %total | #      | %    | # |                                    |      |        |        |           |      |       |      |
| N00006    | Mcm10     | B03      | RESGRO | 57                             | 13          | 22.8% | 7        | 53.8%  | 12.3%  | 6      | 86%  | 1 | 71%                                | 2    | 1      | 2      | 1         | 6    | 2     | 33%  |
| N00006    | Mcm10     | B03      | VGB6   | 59                             | 4           | 6.8%  | 3        | 75.0%  | 5.1%   | 2      | 67%  | 0 | 67%                                | 2    | 0      | 0      | 0         | 2    | 2     | 100% |
| N00006    | Mcm10     | B03      | KOSR   | 41                             | 14          | 34.1% | 8        | 57.1%  | 19.5%  | 7      | 88%  | 0 | 63%                                | 0    | 4      | 1      | 2         | 5    | 2     | 40%  |
| N00007    | Anxa6     | F05      | RESGRO | 57                             | 20          | 35.1% | 7        | 35.0%  | 12.3%  | 4      | 57%  | 0 | 43%                                | 1    | 1      | 1      | 1         | 7    | 2     | 29%  |
| N00007    | Anxa6     | F05      | VGB6   | 60                             | 12          | 20.0% | 6        | 50.0%  | 10.0%  | 4      | 67%  | 0 | 50%                                | 0    | 3      | 0      | 1         | 3    | 2     | 67%  |
| N00007    | Anxa6     | F05      | KOSR   | 57                             | 11          | 19.3% | 2        | 18.2%  | 3.5%   | 1      | 50%  | 1 | 0%                                 | 0    | 0      | 0      | 1         | 1    | 0     | 0%   |
| N00009    | Ahcy      | F11      | RESGRO | 82                             | 2           | 2.4%  | 2        | 100.0% | 2.4%   | 0      | 0%   | 2 | 100%                               | 0    | 0      | 2      | 0         | 2    | 0     | 0%   |
| N00009    | Ahcy      | F11      | VGB6   | 63                             | 7           | 11.1% | 5        | 71.4%  | 7.9%   | 1      | 20%  | 2 | 0%                                 | 0    | 0      | 0      | 1         | 1    | 0     | 0%   |
| N00009    | Ahcy      | F11      | KOSR   | 81                             | 33          | 40.7% | 4        | 12.1%  | 4.9%   | 3      | 75%  | 1 | 0%                                 | 0    | 0      | 0      | 3         | 3    | 0     | 0%   |
| N00016    | Centd2    | A05      | RESGRO | 86                             | 21          | 24.4% | 5        | 23.8%  | 5.8%   | 3      | 60%  | 1 | 40%                                | 0    | 1      | 1      | 1         | 2    | 1     | 50%  |
| N00016    | Centd2    | A05      | VGB6   | 86                             | 11          | 12.8% | 8        | 72.7%  | 9.3%   | 6      | 75%  | 0 | 75%                                | 4    | 2      | 0      | 0         | 6    | 5     | 83%  |
| N00016    | Centd2    | A05      | KOSR   | 87                             | 27          | 31.0% | 5        | 18.5%  | 5.7%   | 3      | 60%  | 0 | 60%                                | 0    | 0      | 3      | 0         | 3    | 0     | 0%   |
| N00020    | Tbc1d2    | B10      | RESGRO | 69                             | 26          | 37.7% | 1        | 3.8%   | 1.4%   | 1      | 100% | 0 | 100%                               | 0    | 0      | 1      | 0         | 1    | 0     | 0%   |
| N00020    | Tbc1d2    | B10      | VGB6   | 42                             | 7           | 16.7% | 6        | 85.7%  | 14.3%  | 4      | 67%  | 0 | 50%                                | 0    | 3      | 0      | 1         | 4    | 0     | 0%   |
| N00020    | Tbc1d2    | B10      | KOSR   | 84                             | 18          | 21.4% | 1        | 5.6%   | 1.2%   | 0      | 0%   | 1 | 0%                                 | 0    | 0      | 0      | 0         | NT   | NT    | NT   |
