# Supplementary material for: Efficient Generation of Germ Line Transmitting Chimeras from C57BL/6N ES Cells by Aggregation with Outbred Host Embryos
Source: PubMed Central journal article supplement (PMC2889837; doi:10.1371/journal.pone.0011260), 2010-06-22
Supplement: pone.0011260.s002.pdf [file pone.0011260.s002.pdf]

**Table S2. Number, chimerism and GLT data for mice derived from targeted C57BL/6NTac-C2 clones cultured in either KOSR+2i or VGB6 immediately before aggregation.**

| Construct | Gene     | Clone | Media | Total # aggregates transferred | Development |       |          |        |        | Weaned |        |   |       | ES coat colour contribution |        |        |      | Fertility |       |      |
|-----------|----------|-------|-------|--------------------------------|-------------|-------|----------|--------|--------|--------|--------|---|-------|-----------------------------|--------|--------|------|-----------|-------|------|
|           |          |       |       |                                | Born        |       | Chimeras |        |        | M      |        | F | %chim | ES coat colour contribution |        |        |      | # BP      | # GLT | %    |
|           |          |       |       |                                | #           | %     | #        | %born  | %total | #      | % born | # | >50%  | 100%                        | 99-75% | 74-50% | <50% |           |       |      |
| N00005    | Zfp202   | G01   | 2i    | 167                            | 24          | 14.4% | 13       | 54.2%  | 7.8%   | 6      | 46%    | 4 | 38%   | 1                           | 0      | 4      | 1    | 4         | 3     | 75%  |
| N00005    | Zfp202   | G01   | VGB6  | 166                            | 15          | 9.0%  | 11       | 73.3%  | 6.6%   | 7      | 64%    | 2 | 45%   | 1                           | 2      | 2      | 2    | 3         | 0     | 0%   |
| N00020    | Tbc1d2   | A11   | 2i    | 72                             | 23          | 31.9% | 10       | 43.5%  | 13.9%  | 9      | 90%    | 5 | 80%   | 2                           | 2      | 4      | 6    | 4         | 1     | 25%  |
| N00020    | Tbc1d2   | A11   | VGB6  | 70                             | 17          | 24.3% | 12       | 70.6%  | 17.1%  | 9      | 75%    | 0 | 75%   | 4                           | 5      | 0      | 0    | 4         | 2     | 50%  |
| N00020    | Tbc1d2   | C11   | 2i    | 92                             | 20          | 21.7% | 1        | 5.0%   | 1.1%   | 1      | 100%   | 2 | 100%  | 0                           | 0      | 1      | 2    | 1         | 0     | 0%   |
| N00020    | Tbc1d2   | C11   | VGB6  | 95                             | 15          | 15.8% | 10       | 66.7%  | 10.5%  | 8      | 80%    | 1 | 80%   | 4                           | 2      | 2      | 1    | 4         | 2     | 50%  |
| N01150¶   | Zfp871   | D01   | 2i    | 83                             | 22          | 26.5% | 18       | 81.8%  | 21.7%  | 7      | 39%    | 0 | 22%   | 1                           | 1      | 2      | 3    | 4         | 2     | 50%  |
| N01150¶   | Zfp871   | D01   | VGB6  | 63                             | 6           | 9.5%  | 6        | 100.0% | 9.5%   | 0      | 0%     | 0 | 0%    | 0                           | 0      | 0      | 0    | -         | -     | -    |
| N01174    | Angel1   | F12   | 2i    | 63                             | 6           | 9.5%  | 3        | 50.0%  | 4.8%   | 11     | 367%   | 1 | 33%   | 0                           | 0      | 1      | 2    | 1         | 0     | 0%   |
| N01174    | Angel1   | F12   | VGB6  | 102                            | 22          | 21.6% | 14       | 63.6%  | 13.7%  | 11     | 79%    | 1 | 57%   | 4                           | 2      | 2      | 0    | 8         | 1     | 13%  |
| N01174    | Angel1   | D11   | 2i    | 77                             | 19          | 24.7% | 7        | 36.8%  | 9.1%   | 7      | 100%   | 0 | 100%  | 1                           | 4      | 2      | 2    | 5         | 1     | 20%  |
| N01174    | Angel1   | D11   | VGB6  | 79                             | 23          | 29.1% | 9        | 39.1%  | 11.4%  | 8      | 89%    | 1 | 56%   | 1                           | 2      | 2      | 3    | 6         | 1     | 17%  |
| N00086    | Dhx40    | C07   | 2i    | 67                             | 30          | 44.8% | 7        | 23.3%  | 10.4%  | 7      | 100%   | 0 | 43%   | 0                           | 1      | 2      | 4    | 3         | 1     | 33%  |
| N00086    | Dhx40    | C07   | VGB6  | 51                             | 11          | 21.6% | 9        | 81.8%  | 17.6%  | 6      | 67%    | 0 | 56%   | 1                           | 2      | 2      | 2    | 3         | 0     | 0%   |
| N00105    | Itch     | A08   | 2i    | 68                             | 24          | 35.3% | 4        | 16.7%  | 5.9%   | 5      | 125%   | 0 | 25%   | 0                           | 0      | 1      | 4    | 1         | 1     | 100% |
| N00105    | Itch     | A08   | VGB6  | 54                             | 17          | 31.5% | 8        | 47.1%  | 14.8%  | 7      | 88%    | 0 | 63%   | 1                           | 1      | 3      | 2    | 5         | 1     | 20%  |
| N00343    | 15M20Rik | F05   | 2i    | 45                             | 12          | 26.7% | 4        | 33.3%  | 8.9%   | 3      | 75%    | 1 | 25%   | 0                           | 0      | 1      | 3    | 1         | 0     | 0%   |
| N00343    | 15M20Rik | F05   | VGB6  | 128                            | 19          | 14.8% | 13       | 68.4%  | 10.2%  | 5      | 38%    | 4 | 46%   | 0                           | 4      | 2      | 3    | 4         | 1     | 25%  |
| N00135    | Otud7b   | G09   | 2i    | 47                             | 15          | 31.9% | 8        | 53.3%  | -      | 5      | 63%    | 3 | 50%   | 0                           | 2      | 2      | 4    | 4         | 1     | 25%  |
| N00135    | Otud7b   | G09   | VGB6  | 46                             | 12          | 26.1% | 8        | 66.7%  | 17.4%  | 6      | 75%    | 1 | 75%   | 1                           | 0      | 5      | 0    | 6         | 2     | 33%  |
| N01113    | Psm2     | F10   | 2i    | 24                             | 1           | 4.2%  | 1        | 100.0% | 4.2%   | 1      | 100%   | 0 | 100%  | 0                           | 0      | 1      | 0    | 1         | 1     | 100% |
| N01113    | Psm2     | F10   | VGB6  | 24                             | 2           | 8.3%  | 2        | 100.0% | 8.3%   | 2      | 100%   | 0 | 100%  | 2                           | 0      | 0      | 0    | 2         | 2     | 100% |
| N01113    | Psm2     | F10   | 2i    | 69                             | 13          | 18.8% | 8        | 61.5%  | 11.6%  | 7      | 88%    | 1 | 50%   | 2                           | 2      | 0      | 3    | 4         | 2     | 50%  |
| N01113    | Psm2     | F10   | VGB6  | 69                             | 17          | 24.6% | 15       | 88.2%  | 21.7%  | 11     | 73%    | 4 | 40%   | 2                           | 2      | 2      | 5    | 4         | 2     | 50%  |
| N01554†   | 18L17Rik | A03   | 2i    | 69                             | 3           | 4.3%  | 1        | 33.3%  | 1.4%   | 0      | 0%     | 0 | 0%    | -                           | -      | -      | -    | -         | -     | -    |
| N01554†   | 18L17Rik | A03   | VGB6  | 41                             | 3           | 7.3%  | 3        | 100.0% | -      | 0      | 0%     | 0 | 0%    | -                           | -      | -      | -    | -         | -     | -    |
| N00324    | Senp3    | D04   | 2i    | 84                             | 17          | 20.2% | 8        | 47.1%  | 9.5%   | 7      | 88%    | 5 | 63%   | 0                           | 3      | 2      | 2    | 5         | 3     | 60%  |
| N00324    | Senp3    | D04   | VGB6  | 54                             | 13          | 24.1% | 10       | 76.9%  | 18.5%  | 9      | 90%    | 0 | 90%   | 0                           | 3      | 6      | 0    | 4         | 1     | 25%  |
| N00109    | Pum1     | G01   | 2i    | 84                             | 10          | 11.9% | 9        | 90.0%  | 10.7%  | 8      | 89%    | 1 | 67%   | 0                           | 3      | 3      | 3    | 6         | 1     | 17%  |
| N00109    | Pum1     | G01   | VGB6  | 84                             | 14          | 16.7% | 14       | 100.0% | 16.7%  | 7      | 50%    | 2 | 43%   | 2                           | 0      | 4      | 3    | 6         | 3     | 50%  |
| N01554    | 18L17Rik | E03   | 2i    | 57                             | 21          | 36.8% | 13       | 61.9%  | 22.8%  | 12     | 92%    | 1 | 92%   | 5                           | 2      | 5      | 0    | 4         | 2     | 50%  |
| N01554    | 18L17Rik | E03   | VGB6  | 53                             | 12          | 22.6% | 9        | 75.0%  | 17.0%  | 9      | 100%   | 0 | 100%  | 5                           | 0      | 4      | 0    | 3         | 3     | 100% |
| N01551    | Ostf1    | A02   | 2i    | 73                             | 25          | 34.2% | 20       | 80.0%  | 27.4%  | 19     | 95%    | 1 | 45%   | 1                           | 8      | 0      | 10   | 3         | 3     | 100% |
| N01551    | Ostf1    | A02   | VGB6  | 75                             | 12          | 16.0% | 10       | 83.3%  | 13.3%  | 10     | 100%   | 0 | 100%  | 7                           | 3      | 0      | 0    | 4         | 2     | 50%  |
| N01605    | Zbtb45   | C04   | 2i    | 94                             | 22          | 23.4% | 11       | 50.0%  | 11.7%  | 8      | 73%    | 3 | 64%   | 4                           | 2      | 1      | 4    | 3         | 1     | 33%  |
| N01605    | Zbtb45   | C04   | VGB6  | 88                             | 8           | 9.1%  | 7        | 87.5%  | 8.0%   | 5      | 71%    | 0 | 71%   | 5                           | 0      | 0      | 0    | 3         | 2     | 67%  |

**Table S2. Number, chimerism and GLT data for mice derived from targeted C57BL/6NTac-C2 clones cultured in either KOSR+2i or VGB6 immediately before aggregation.**

| Construct | Gene    | Clone | Media | Total # aggregates transferred | Development |       |          |        |        | Weaned |        |   |       | ES coat colour contribution |        |        |      | Fertility |       |      |
|-----------|---------|-------|-------|--------------------------------|-------------|-------|----------|--------|--------|--------|--------|---|-------|-----------------------------|--------|--------|------|-----------|-------|------|
|           |         |       |       |                                | Born        |       | Chimeras |        |        | M      |        | F | %chim |                             |        |        |      | # BP      | # GLT | %    |
|           |         |       |       |                                | #           | %     | #        | %born  | %total | #      | % born | # | >50%  | 100%                        | 99-75% | 74-50% | <50% |           |       |      |
| N01234    | Zfp428  | G10   | 2i    | 91                             | 17          | 18.7% | 8        | 47.1%  | 8.8%   | 5      | 63%    | 3 | 38%   | 1                           | 0      | 2      | 5    | 3         | 0     | 0%   |
| N01234    | Zfp428  | G10   | VGB6  | ND                             | -           | -     | -        | -      | -      | -      | -      | - | -     | -                           | -      | -      | -    | -         | -     | -    |
| N00087    | Rab1    | E05   | 2i    | 127                            | 44          | 26.4% | 12       | 27.3%  | 9.4%   | 5      | 42%    | 2 | 50%   | 0                           | 1      | 5      | 5    | 7         | 1     | 14%  |
| N00087    | Rab1    | E05   | VGB6  | 132                            | 25          | 13.8% | 9        | 36.0%  | 6.8%   | 1      | 11%    | 2 | 22%   | 0                           | 0      | 2      | 4    | 2         | 0     | 0%   |
| N00138    | Zbtb8a  | A10   | 2i    | 105                            | 18          | 17.1% | 13       | 72.2%  | 12.4%  | 7      | 54%    | 3 | 38%   | 0                           | 1      | 4      | 5    | 5         | 1     | 20%  |
| N00138    | Zbtb8a  | A10   | VGB6  | 75                             | 3           | 4.0%  | 3        | 100.0% | 4.0%   | 1      | 33%    | 0 | 33%   | 1                           | 0      | 0      | 0    | 1         | 1     | 100% |
| N00279    | Pde4d   | D08   | 2i    | 51                             | 12          | 23.5% | 7        | 58.3%  | 13.7%  | 4      | 57%    | 0 | 57%   | 3                           | 0      | 1      | 0    | 4         | 2     | 50%  |
| N00279    | Pde4d   | D08   | VGB6  | 97                             | 12          | 12.4% | 7        | 58.3%  | 7.2%   | 6      | 86%    | 0 | 71%   | 3                           | 1      | 1      | 1    | 4         | 1     | 25%  |
| N00352    | Htra1   | D01   | 2i    | 120                            | 14          | 11.7% | 8        | 57.1%  | 6.7%   | 5      | 63%    | 1 | 38%   | 0                           | 2      | 1      | 2    | 3         | 1     | 33%  |
| N00352    | Htra1   | D01   | VGB6  | 73                             | 6           | 8.2%  | 2        | 33.3%  | 2.7%   | 1      | 50%    | 1 | 50%   | 1                           | 0      | 0      | 0    | 1         | 1     | 100% |
| N00082    | Taok1   | A02   | 2i    | 107                            | 29          | 27.1% | 19       | 65.5%  | 17.8%  | 8      | 42%    | 9 | 32%   | 0                           | 0      | 6      | 2    | 5         | 0     | 0%   |
| N00082    | Taok1   | A02   | VGB6  | 100                            | 21          | 21.0% | 12       | 57.1%  | 12.0%  | 5      | 42%    | 2 | 42%   | 0                           | 0      | 5      | 0    | 4         | 0     | 0%   |
| N01077    | Myd88   | C06   | 2i    | 127                            | 14          | 11.0% | 2        | 14.3%  | 1.6%   | 1      | 50%    | 2 | 50%   | 0                           | 0      | 1      | 2    | 1         | 1     | 100% |
| N01077    | Myd88   | C06   | VGB6  | 133                            | 21          | 15.8% | 4        | 19.0%  | 3.0%   | 1      | 25%    | 0 | 0%    | 0                           | 0      | 0      | 3    | -         | -     | -    |
| N01539    | Senp6   | C07   | 2i    | 63                             | 7           | 11.1% | 6        | 85.7%  | 9.5%   | 5      | 83%    | 1 | 33%   | 1                           | 0      | 1      | 4    | 2         | 1     | 50%  |
| N01539    | Senp6   | C07   | VGB6  | 82                             | 32          | 39.0% | 19       | 59.4%  | 23.2%  | 8      | 42%    | 1 | 53%   | 5                           | 1      | 4      | 1    | 4         | 1     | 25%  |
| N01590    | Tmem116 | D08   | 2i    | 29                             | 11          | 37.9% | 6        | 54.5%  | 20.7%  | 5      | 83%    | 0 | 67%   | 1                           | 1      | 2      | 1    | 4         | 1     | 25%  |
| N01590    | Tmem116 | D08   | VGB6  | 73                             | 31          | 42.5% | 25       | 80.6%  | 34.2%  | 21     | 84%    | 0 | 64%   | 5                           | 0      | 11     | 5    | 5         | 1     | 20%  |

¶Half of KOSR+2i (9) and all VGB6 chimeras (6) died before weaning.

†All chimeras dead PN 3 days.

IP, testing in progress
