# Supplementary material for: Efficient Generation of Germ Line Transmitting Chimeras from C57BL/6N ES Cells by Aggregation with Outbred Host Embryos
Source: PubMed Central journal article supplement (PMC2889837; doi:10.1371/journal.pone.0011260), 2010-06-22
Supplement: pone.0011260.s003.pdf [file pone.0011260.s003.pdf]

**Table S3. Germline transmission test results for individual chimeric mice derived from targeted C57BL/6NTac-C2 clones.**

| <b>TOTAL # CHIMERAS TESTED PER CATEGORY:</b> |               |      |         |                                     |      |         |                 |      |         |
|----------------------------------------------|---------------|------|---------|-------------------------------------|------|---------|-----------------|------|---------|
| Media                                        | 100% chimeras |      |         | 99-75% chimeras                     |      |         | 74-50% chimeras |      |         |
| RESGRO                                       | 3             |      |         | 6                                   |      |         | 2               |      |         |
| VGB6                                         | 6             |      |         | 8                                   |      |         | 0               |      |         |
| 2i                                           | 16            |      |         | 43                                  |      |         | 29              |      |         |
| VGB6                                         | 34            |      |         | 37                                  |      |         | 19              |      |         |
| <b># CHIMERAS PER GLT CATEGORY:</b>          |               |      |         |                                     |      |         |                 |      |         |
| Media                                        | 100% chimeras |      |         | 99-75% chimeras                     |      |         | 74-50% chimeras |      |         |
|                                              | GLT+          | GLT- | sterile | GLT+                                | GLT- | sterile | GLT+            | GLT- | sterile |
| RESGRO                                       | 3             | 0    | 0       | 2                                   | 3    | 1       | 0               | 1    | 1       |
| VGB6                                         | 6             | 0    | 0       | 3                                   | 2    | 3       | 0               | 0    | 0       |
| KOSR+2i                                      | 8             | 2    | 6       | 17                                  | 15   | 11      | 6               | 10   | 13      |
| VGB6                                         | 22            | 1    | 11      | 6                                   | 18   | 13      | 2               | 10   | 7       |
| <b>PERCENTAGES:</b>                          |               |      |         |                                     |      |         |                 |      |         |
| Media                                        | 100% chimeras |      |         | 99-75% chimeras                     |      |         | 74-50% chimeras |      |         |
|                                              | GLT+          | GLT- | sterile | GLT+                                | GLT- | sterile | GLT+            | GLT- | sterile |
| RESGRO                                       | 100%          | 0%   | 0%      | 33%                                 | 50%  | 17%     | 0%              | 50%  | 50%     |
| VGB6                                         | 100%          | 0%   | 0%      | 38%                                 | 25%  | 38%     | 0%              | 0%   | 0%      |
| KOSR+2i                                      | 50%           | 13%  | 38%     | 40%                                 | 35%  | 26%     | 21%             | 34%  | 45%     |
| VGB6                                         | 65%           | 3%   | 32%     | 16%                                 | 49%  | 35%     | 11%             | 53%  | 37%     |
| <b>GRAND TOTALS:</b>                         |               |      |         |                                     |      |         |                 |      |         |
| GLT+                                         | 75            |      |         | <b>Total # chimeras tested: 203</b> |      |         |                 |      |         |
| GLT-                                         | 62            |      |         |                                     |      |         |                 |      |         |
| Sterile                                      | 66            |      |         |                                     |      |         |                 |      |         |
